# Supplementary material for: Synergistic coupling of a CuNi alloy with a CoFe LDH heterostructure on nickel foam toward high-efficiency overall water splitting
Source: Royal Society of Chemistry journal article supplement (doi:10.1039/d4ta05681g), 2024-01-01
Supplement: d4ta05681g1.pdf [file d4ta05681g1.pdf]

## Supporting information

# **Synergistic Coupling of CuNi Alloy with CoFe LDH Heterostructure on Nickel Foam toward High-Efficiency Overall Water Splitting**

Dan Wang<sup>a</sup>, Yuan Chu<sup>a</sup>, Youzheng Wu<sup>b</sup>, Mengkang Zhu<sup>a</sup>, Lin Pan<sup>a</sup>, Ruopeng Li<sup>b</sup>,  
Yukai Chen<sup>a</sup>, Wenchang Wang<sup>a,c</sup>, Naotoshi Mitsuzaki<sup>d</sup>, Zhidong Chen<sup>a\*</sup>

<sup>a</sup> Jiangsu Key Laboratory of Advanced Catalytic Materials and Technology, Advanced Catalysis and Green Manufacturing Collaborative Innovation Center, School of Petrochemical Engineering, Changzhou University, Changzhou, Jiangsu, 213164, China

<sup>b</sup> MIIT Key Laboratory of Critical Materials Technology for New Energy Conversion and Storage, School of Chemistry and Chemical Engineering, Harbin Institute of Technology, Harbin 150001, China

<sup>c</sup> Analysis and Testing Center, NERC Biomass of Changzhou University, Changzhou, Jiangsu, 213032, China

<sup>d</sup> Qualtec Co., Ltd, Osaka, 590-0906, Japan

\*E-mail: zdchen@cczu.edu.cn

## Experimental Section

### Material characterizations

The morphologies of all samples were detected via scanning electron microscopy (SEM, JEOL-JSM 6360LA) and transmission electron microscopy (TEM, JEOL-JEM 2100 F). The lattice parameters were originated from (X-ray diffraction XRD) (Bruker D8 Advance) and high-resolution transmission electron microscopy (HRTEM). The chemical composition of the sample was examined by X-ray photoelectron spectroscopy (XPS, PHI-Vesoprobe 5000 III).

### Electrochemical measurements

The electrochemical experiments were performed on a CHI660E electrochemical workstation equipped with a three-electrode configuration in 1.0 M KOH or 1.0 M KOH + seawater. In the three-electrode system, the graphite, the Hg/HgO electrode, and the prepared sample ( $1 \times 1 \text{ cm}^2$ ) are served as the counter, reference, and working electrode, respectively. For comparison, the Pt@NF and RuO<sub>2</sub>@NF were prepared. Specifically, 5 mg of Pt/C (or RuO<sub>2</sub>) was dispersed in mixed solution containing 240  $\mu\text{L}$  ethanol and 10  $\mu\text{L}$  Nafion. The above solution was then ultrasonicated for 30 min to form a homogenous ink. Finally, 50  $\mu\text{L}$  of ink was loaded on the pretreated NF to control the mass loading to be  $1 \text{ mg cm}^{-2}$ , followed by drying in vacuum.

Before the linear sweep voltammetry (LSV) test, the electrodes were activated by cyclic voltammetry (CV) with a sweep rate of  $0.1 \text{ V s}^{-1}$ . The LSV curves of OER and HER were recorded at a scan rate of  $5 \text{ mV s}^{-1}$ . All potentials were converted to a reversible hydrogen electrode (RHE) by the following formula:  $E_{\text{RHE}} = E_{\text{Hg/HgO}} + 0.059 \text{ pH} + 0.098$ . The electrochemical impedance spectroscopy (EIS) was measured in the frequency range of  $0.01 \sim 100 \text{ kHz}$  with an amplitude of  $5 \text{ mV}$ . The double-layer capacitance ( $C_{\text{dl}}$ ) was determined by CV at various scan rates (20, 40, 60, 80, 100 and  $120 \text{ mV s}^{-1}$ ) in the non-Faradaic region. The stability of the samples was performed by chronopotentiometry and the multistep method. All the curves displayed in this work were corrected against the 95% iR correction.

The turnover frequency (TOF) value can be evaluated with the following equation:

$$TOF = \frac{I}{znF}$$

Here,  $I$ ,  $F$ ,  $z$ , and  $n$  represent the current (A), Faraday constant (96485 C mol<sup>-1</sup>), the number of electrons transferred during HER ( $z=2$ ) or OER ( $z=4$ ), and active site density (mol) during HER or OER in 1 M KOH, respectively. Referring to previous studies (Adv. Mater. 2022, 34, 2203615), CV curves were performed in 1 M PBS electrolyte (pH = 7) with a scan rate of 50 mV s<sup>-1</sup> at a potential range of -0.2 to 0.6 V vs. RHE to measure the integrated charge ( $Q$ ). The number of active sites ( $n$ ) can be estimated according to the following formula:

$$n = \frac{Q}{zF}$$

Here  $F$ ,  $z$  and  $Q$  represent Faraday constant, the number of electrons transferred during HER ( $z=2$ ) or OER ( $z=4$ ), and the integrated charge from the CV curve, respectively.

### **DFT calculations**

First-principles calculations are performed by vienna ab initio simulation package (VASP)<sup>[1-2]</sup>. The generalized gradient approximation (GGA) of Perdew-Burke-Ernzerhof (PBE) is used to describe the exchange-correlation functional<sup>[3]</sup>. To accurately describe the dispersion interactions in our simulations, the DFT-D3 method was employed<sup>[4]</sup>. The cut-off energy for the plane wave basis is set to 500 eV and a 3×3×1 Monkhorst-pack mesh is employed. All models in this work are with vacuum layers of 15 Å. The top two layers of atoms were fully relaxed (atomic position) up to 10<sup>-4</sup> eV/Å force minimization and max force of 0.05 eV/ Å. The DFT+U method was used to calculate the electronic properties of Fe, Co, Ni and Cu with  $U$  of 3.3, 3.4, 3.4 and 3.4 eV<sup>[5]</sup>.

[1] G. Kresse, J. Furthmüller. Efficiency of ab-initio total energy calculations for metals and semiconductors using a plane-wave basis set, Computational Materials Science, 1996, 6,15-50.

[2] G. Kresse, D. Joubert, From ultrasoft pseudopotentials to the projector augmented-wave method, Physical Review B 1999, 59, 1758-1775.

[3] J.P. Perdew, K. Burke, M. Ernzerhof, Generalized Gradient Approximation Made Simple,

Physical Review Letters, 1996, 77 (18), 3865-3868.

[4] S. Grimme, J. Antony, S. Ehrlich, and S. Krieg, A Consistent and Accurate ab Initio Parametrization of Density Functional Dispersion Correction (DFT-D) for the 94 Elements H-Pu. The Journal of Chemical Physics, 2010, 132, 154104.

[5] V. I. Anisimov, Zaanen, Andersen, Band theory and Mott insulators: Hubbard U instead of Stoner I, Physical Review. B, Condensed matter 1991, 44, 943-954.

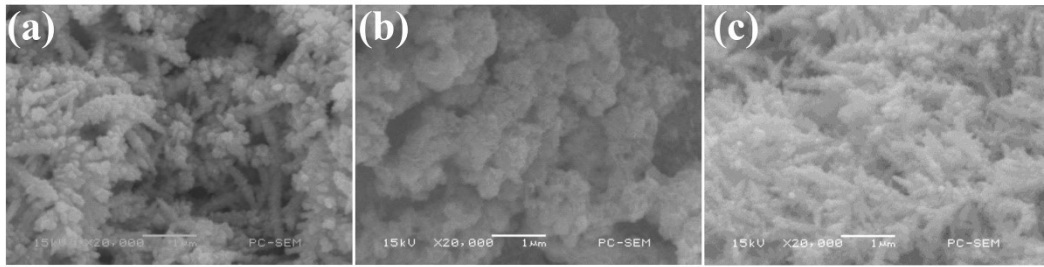

**Figure S1** SEM images of (a) CuNi@NF, (b) CoFe LDH@NF, and (c) CuNi/CoFe LDH@NF.

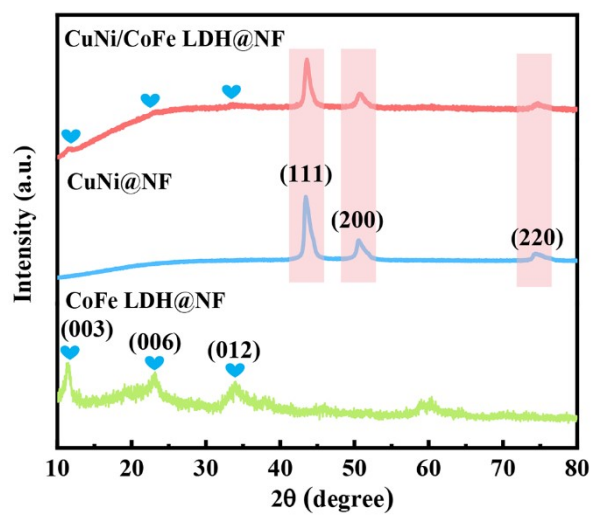

**Figure S2** XRD patterns of all samples.

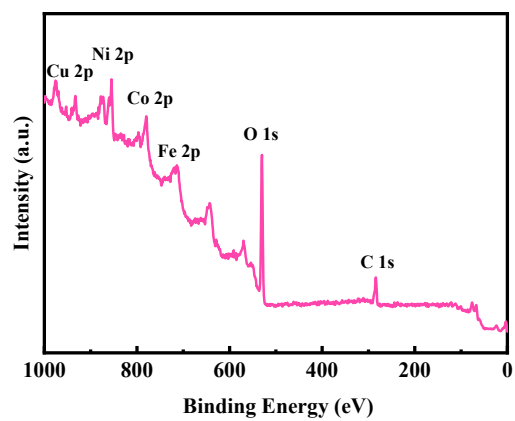

**Figure S3** The overall XPS spectra of CuNi/CoFe LDH@NF.

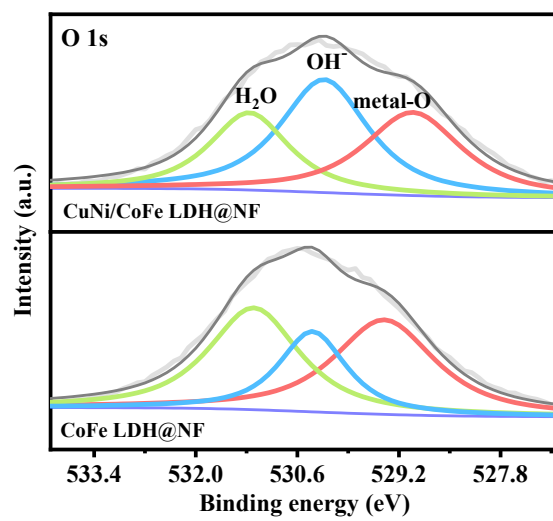

**Figure S4** The O1s XPS spectra of CuNi/CoFe LDH@NF and CoFe LDH@NF.



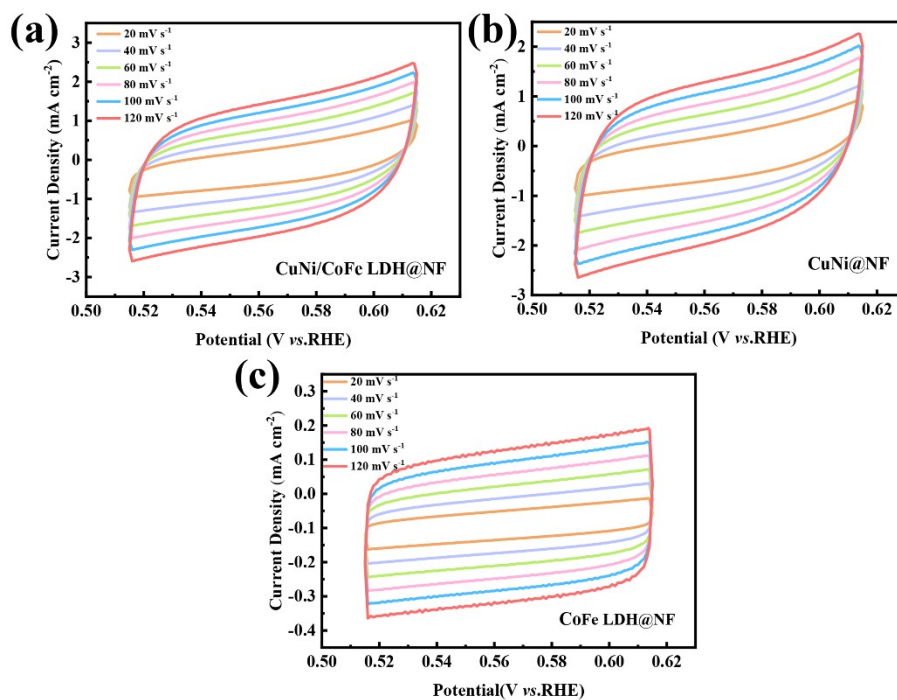

**Figure S5** CV curves of (a) CuNi/CoFe LDH@NF, (b) CuNi@NF, and (c) CoFe LDH@NF in the region of 0.515~0.615 V vs.RHE in 1.0 M KOH at various scan rates.

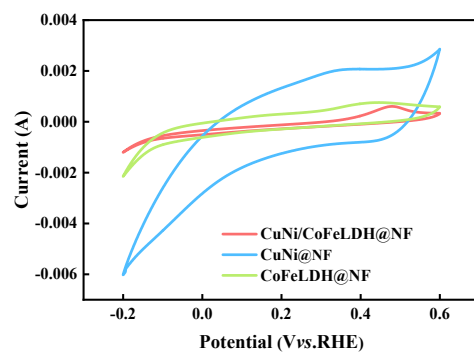

**Figure S6** CVs of CuNi/CoFe LDH@NF in 1.0 M PBS (pH=7) with a scan rate of 50 mV s<sup>-1</sup>.

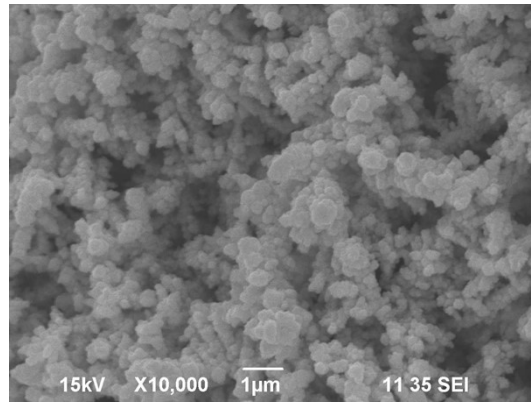

**Figure S7** SEM image of CuNi/CoFe LDH@NF after HER stability test.

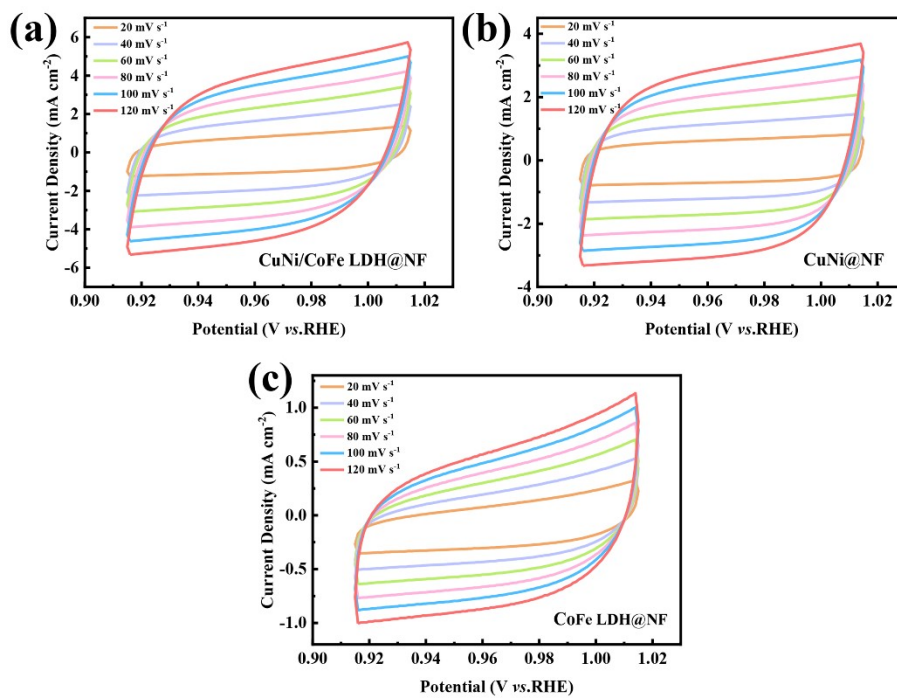

**Figure S8** CV curves of (a) CuNi/CoFe LDH@NF, (b) CuNi@NF, and (c) CoFe LDH@NF in the region of 0.915~1.015 V vs.RHE in 1.0 M KOH at various scan rates.

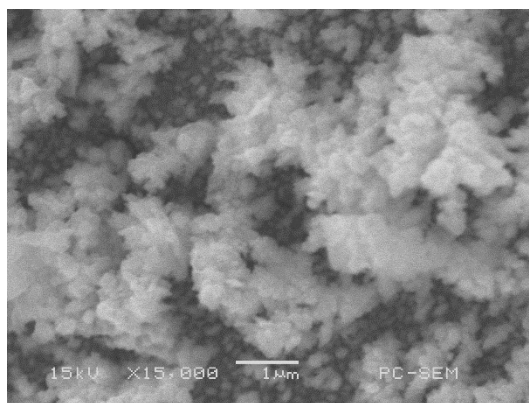

**Figure S9** SEM image of CuNi/CoFe LDH@NF after OER stability test.

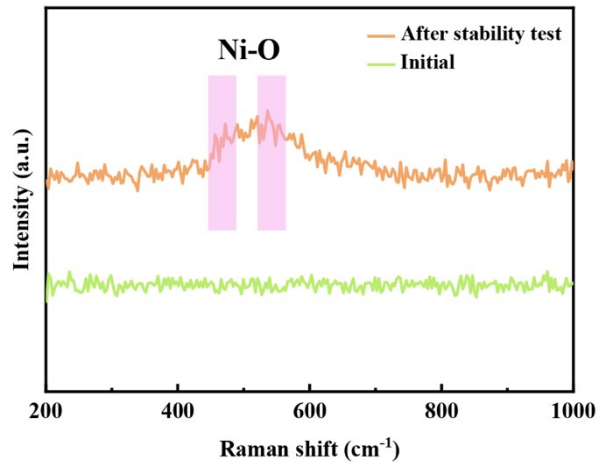

**Figure S10** Raman spectra for CuNi/CoFe LDH@NF before and after stability test.

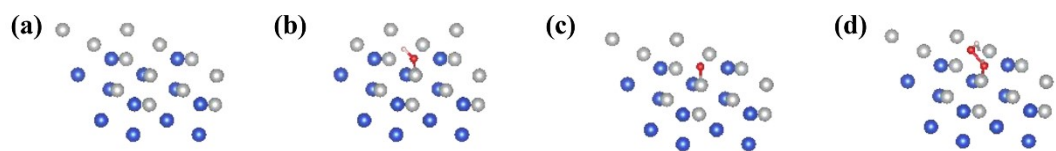

**Figure S11** The absorption models of CuNi (111) and intermediates on CuNi (111). (a) CuNi (111), (b) \*OH, (c) \*O, (d) \*OOH.

**Table S1** Comparison of HER performance with those of recently reported catalysts in 1 M KOH ( $10 \text{ mA} \cdot \text{cm}^{-2}$ ).

| Electrocatalysts                                       | Overpotential (mV) | References                                             |
|--------------------------------------------------------|--------------------|--------------------------------------------------------|
| CuNi/CoFe LDH@NF                                       | 56                 | <i>This work</i>                                       |
| CoP/NiCoP/NC                                           | 75                 | <i>Adv. Funct. Mater.</i> 2019, 29 (6), 1807976        |
| Ni <sub>2</sub> P-Fe <sub>2</sub> P/NF                 | 92                 | <i>Adv. Funct. Mater.</i> 2021, 31 (1), 2006484        |
| CoP NFs                                                | 136                | <i>ACS Catal.</i> 2020, 10 (1), 412-419                |
| CoSe/Co(OH) <sub>2</sub> -CM (AE)                      | 207                | <i>Composites, Part B</i> 2022, 236, 109823            |
| FCN-8P                                                 | 77                 | <i>Inorg. Chem. Front.</i> 2024, 11, 3585              |
| NiFe <sub>2</sub> O <sub>4</sub> /CoNi-S               | 149                | <i>Int. J. Hydrog. Energy</i> 2021, 46 (12), 8557–8566 |
| FeCoMoP-O                                              | 111                | <i>J. Alloy. Compd.</i> 2020, 820, 153161              |
| CuFe(S <sub>0.8</sub> Se <sub>0.2</sub> ) <sub>2</sub> | 113                | <i>Inorg. Chem. Front.</i> 2023, 10, 2387              |
| MoS <sub>2</sub> /NiFe NPs/NFL/CC                      | 118                | <i>Inorg. Chem. Front.</i> 2023, 10, 1603              |



**Table S2** Comparison of OER performance with those of recently reported catalysts in 1 M KOH.

| Electrocatalysts                       | Overpotential (mV) | Current density (mA cm <sup>-2</sup> ) | References                                        |
|----------------------------------------|--------------------|----------------------------------------|---------------------------------------------------|
| CuNi/CoFe LDH@NF                       | 268                | 50                                     | <i>This work</i>                                  |
| CuNi/CoFe LDH@NF                       | 310                | 100                                    | <i>This work</i>                                  |
| Fe-Ni <sub>2</sub> P@P-C/CuxS          | 330                | 50                                     | <i>Nano Energy</i> 2021, 84, 105861               |
| NiFe-LDH-Vo@NiCu                       | 309                | 100                                    | <i>Chem. Eng. J.</i> 2022, 446, 137226            |
| NiCo-LDH-OH                            | 317                | 10                                     | <i>J. Colloid Interface Sci.</i> 2023, 636, 11-20 |
| Ni <sub>3</sub> N-CeO <sub>2</sub> /NF | 341                | 50                                     | <i>Adv. Funct. Mater.</i> 2023, 33, 2306786       |
| CoNi-LDH/Co@NC                         | 359                | 100                                    | <i>Electrochim. Acta</i> 2023, 444, 141956        |
| NiFeP@TiO <sub>2-x</sub>               | 300                | 100                                    | <i>J. Colloid Interface Sci.</i> 2023, 645, 66-75 |
| S-CoO <sub>x</sub> /NF                 | 370                | 100                                    | <i>Nano Energy</i> 2020, 71, 104652               |
